# Supplementary material
Source: HighWire-hosted journal article supplement (https://erj.ersjournals.com/content/49/1/1600466)

Figure E1

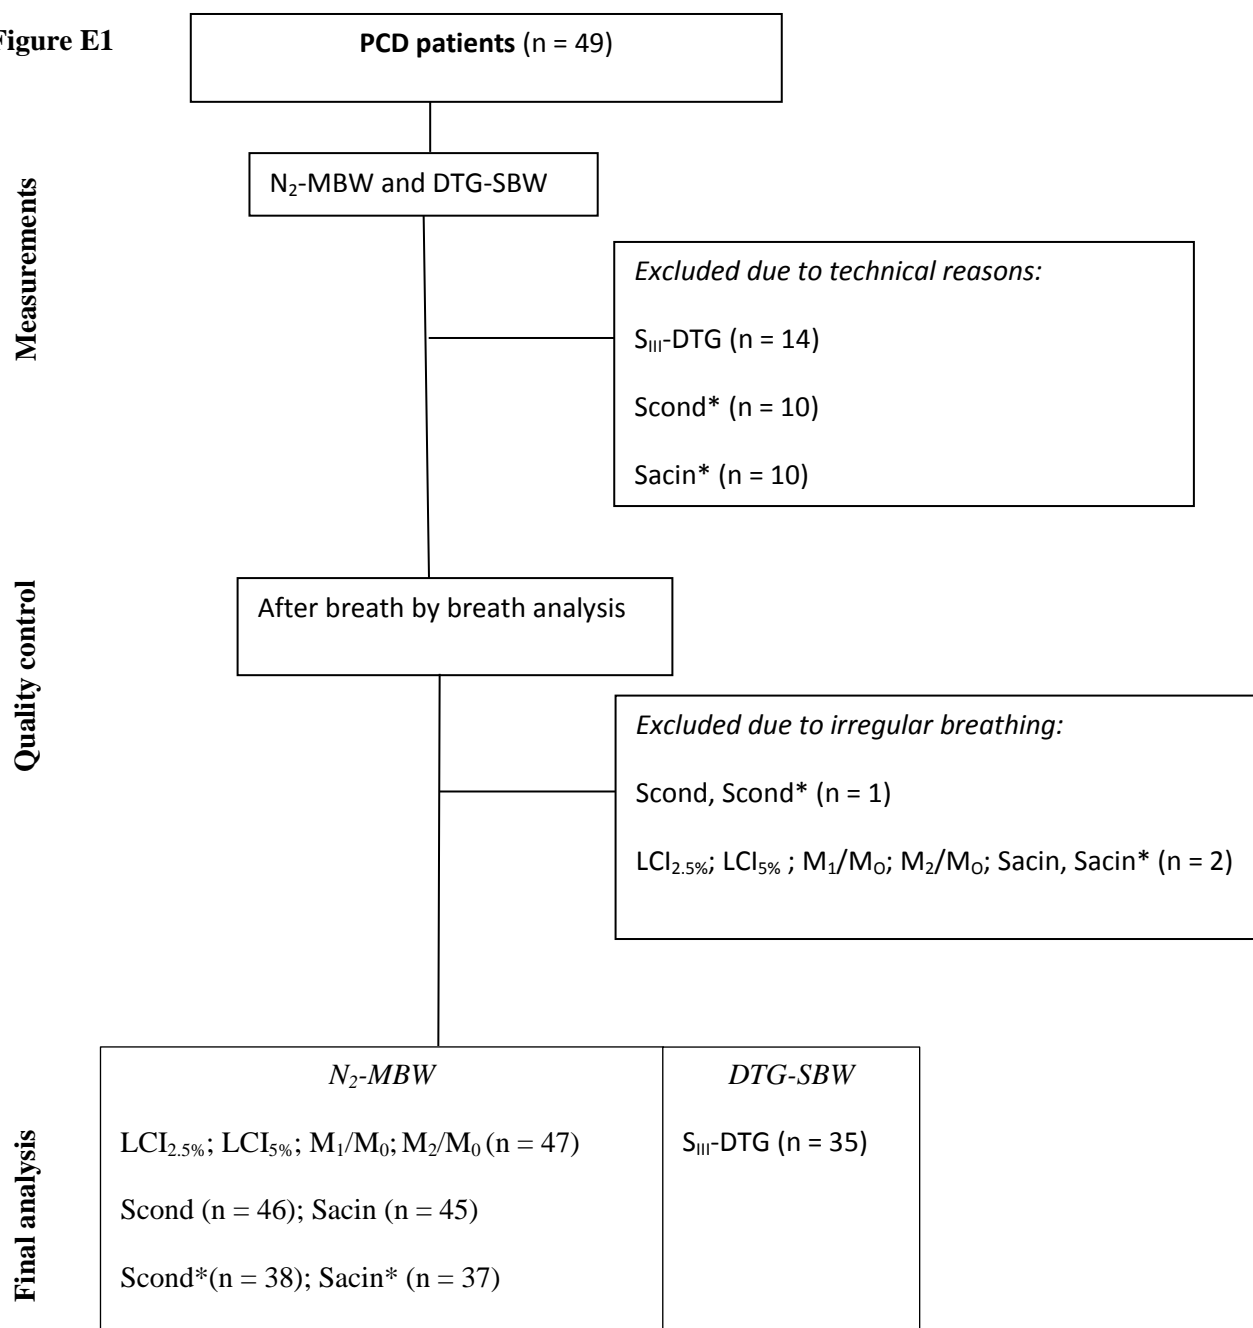

Supplement: inline-supplementary-material-2 [file inline-supplementary-material-2.pdf]
